# Supplementary material for: Aqueous ionic liquid solutions as alternatives for sulphide-free leather processing
Source: Royal Society of Chemistry journal article supplement (doi:10.1039/c4gc01476f), 2014-10-03
Supplement: c4gc01476f1.pdf [file c4gc01476f1.pdf]

## ELECTRONIC SUPPLEMENTARY INFORMATION

### Aqueous Ionic liquid solutions as alternatives for sulphide free leather processing

R. Vijayaraghavan<sup>a\*</sup>, N. Vedaraman<sup>b</sup>, C. Muralidharan<sup>c</sup>, A. B. Mandal<sup>d</sup>, D. R. Macfarlane<sup>a</sup>

<sup>a</sup>School of Chemistry, Monash University, Calyton campus, Victoria, Australia

<sup>b</sup>Chemical Engineering Department, <sup>c</sup>Tannery Division, <sup>d</sup>Chemical Lab, Central Leather Research Institute, India

\* corresponding author

1: **Choline thioglycolate = 1%**

Water = 50%  
Lime = 10%

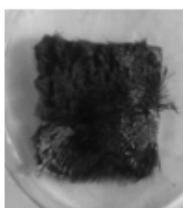

Raw skin

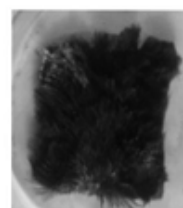

dehairing ability : poor

2: **Choline thioglycolate = 2%**

Water = 50%  
Lime = 10%

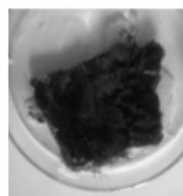

Raw skin

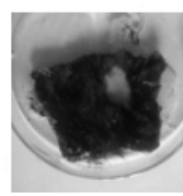

dehairing ability : excellent

3: **Choline thioglycolate = 3%**

Water = 50%  
Lime = 10%

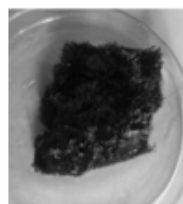

Raw skin

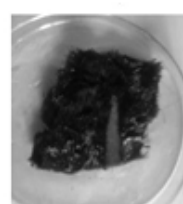

dehairing ability : excellent

ESI- 1 : Depilation experiments : Optimisation of Organic salt
